# Supplementary material
Source: PubMed Central journal article supplement (PMC3571320)
Supplement: JB.01560-12_zjb999092449so1.pdf [file JB.01560-12_zjb999092449so1.pdf]

**Table S1. Genome sequences utilized to determine the distribution of the genes encoding the two FOS transporters**

| Strain         | Accession number | Serotype | FOS transporter |
|----------------|------------------|----------|-----------------|
| 70585          | CP000918.1       | 5        | <i>sfu</i>      |
| 3063-00        | AGQG00000000     | 19F      | <i>fus</i>      |
| 4027-06        | AGNW00000000     | 19A      | <i>fus</i>      |
| 5185-06        | AGQE00000000     | 19A      | <i>fus</i>      |
| 5787-06        | AGOM00000000     | 19A      | <i>fus</i>      |
| 670-6B         | CP002176.1       | 6B       | <i>fus</i>      |
| 6735-05        | AGNX00000000     | 19A      | <i>fus</i>      |
| 6901-05        | AGOF00000000     | 19A      | <i>fus</i>      |
| 6963-05        | AGON00000000     | 19A      | <i>fus</i>      |
| 7286-06        | AGOG00000000     | 19A      | <i>fus</i>      |
| AP200          | CP002121.1       | 11A      | <i>fus</i>      |
| ATCC 700669    | FM211187.1       | 23F      | <i>fus</i>      |
| BS 455         | ADHN00000000     | NT       | <i>fus</i>      |
| BS397          | ABWC00000000     | NT       | <i>fus</i>      |
| BS457          | ABWB00000000     | NT       | <i>fus</i>      |
| BS458          | ABWA00000000     | NT       | <i>fus</i>      |
| CANADA MDR-19A | ACNU00000000     | 19A      | <i>fus</i>      |
| CANADA MDR-19F | ACNV00000000     | 19F      | <i>fus</i>      |
| CCRI1974       | ABZC00000000     | 14       | <i>fus</i>      |
| CCRI1974M2     | ABZT00000000     | 14       | <i>fus</i>      |
| CDC 0288-04    | ABGF00000000     | 12F      | <i>fus</i>      |
| CDC1087-00     | ABFT00000000     | 7F       | <i>sfu</i>      |
| CDC1873-00     | ABFS00000000     | 6A       | <i>fus</i>      |
| CDC3059-06     | ABGG00000000     | 19A      | <i>fus</i>      |
| CGSP14         | CP001033.1       | 14       | <i>fus</i>      |
| D39            | CP000410.1       | 2        | <i>sfu</i>      |
| EU-NP01        | AGQH00000000     | 19A      | <i>fus</i>      |
| G54            | CP001015.1       | 19F      | <i>sfu</i>      |
| GA04375        | AFAX00000000     | 19F      | <i>fus</i>      |
| GA07228        | AGQI00000000     | 3        | <i>fus</i>      |
| GA07643        | AGOT00000000     | 4        | <i>fus</i>      |
| GA08780        | AGQJ00000000     | 9V       | <i>fus</i>      |
| GA11184        | AGNU00000000     | 19F      | <i>fus</i>      |
| GA11304        | AGOU00000000     | 6B       | <i>fus</i>      |
| GA11426        | AGOV00000000     | 19A      | <i>fus</i>      |
| GA11663        | AGOW00000000     | 19F      | <i>fus</i>      |
| GA13338        | AGOX00000000     | 14       | <i>fus</i>      |
| GA13455        | AGOY00000000     | 19F      | <i>fus</i>      |
| GA13494        | AGOZ00000000     | 14       | <i>fus</i>      |

|         |              |     |            |
|---------|--------------|-----|------------|
| GA13637 | AGPA00000000 | 18C | <i>fus</i> |
| GA13856 | AGPB00000000 | 33F | <i>fus</i> |
| GA14798 | AGPC00000000 | 19F | <i>fus</i> |
| GA16121 | AGPD00000000 | 19F | <i>fus</i> |
| GA16242 | AGPE00000000 | 6B  | <i>fus</i> |
| GA16531 | AGOE00000000 | 6B  | <i>fus</i> |
| GA16833 | AGPF00000000 | 19F | <i>fus</i> |
| GA17227 | AGPG00000000 | 23F | <i>fus</i> |
| GA17328 | AGPH00000000 | 6A  | <i>fus</i> |
| GA17371 | AGPI00000000 | 19F | <i>fus</i> |
| GA17545 | AFGA00000000 | 6B  | <i>fus</i> |
| GA17570 | AFGB00000000 | 9V  | <i>fus</i> |
| GA17971 | AGPT00000000 | 6A  | <i>sfu</i> |
| GA18523 | AGOO00000000 | 19A | <i>fus</i> |
| GA19077 | AGPK00000000 | 6A  | <i>fus</i> |
| GA19451 | AGPL00000000 | 19F | <i>fus</i> |
| GA19690 | AGQK00000000 | 3   | <i>fus</i> |
| GA41277 | AGPM00000000 | 19A | <i>fus</i> |
| GA41301 | AFGD00000000 | 23F | <i>fus</i> |
| GA41317 | AFGT00000000 | 33F | <i>fus</i> |
| GA41410 | AGOJ00000000 | 19A | <i>fus</i> |
| GA41437 | AGPN00000000 | 6A  | <i>fus</i> |
| GA41538 | AGOL00000000 | 6B  | <i>fus</i> |
| GA41565 | AGPO00000000 | 19A | <i>fus</i> |
| GA41688 | AGPP00000000 | 14  | <i>fus</i> |
| GA43265 | AGOB00000000 | 19A | <i>fus</i> |
| GA43380 | AGPQ00000000 | 19A | <i>sfu</i> |
| GA44194 | AGOP00000000 | 19A | <i>sfu</i> |
| GA44288 | AGNY00000000 | 19A | <i>fus</i> |
| GA44378 | AGOQ00000000 | 23F | <i>fus</i> |
| GA44452 | AGOC00000000 | 19A | <i>fus</i> |
| GA44500 | AGOI00000000 | 19A | <i>fus</i> |
| GA44511 | AGOR00000000 | 19A | <i>fus</i> |
| GA47033 | AGOA00000000 | 6C  | <i>sfu</i> |
| GA47281 | AGNZ00000000 | 19F | <i>fus</i> |
| GA47283 | AGPR00000000 | 7F  | <i>sfu</i> |
| GA47360 | AGPS00000000 | 19A | <i>fus</i> |
| GA47368 | AFGS00000000 | 19A | <i>fus</i> |
| GA47373 | AGPT00000000 | 19F | <i>fus</i> |
| GA47388 | AGPU00000000 | 19A | <i>fus</i> |
| GA47439 | AGPV00000000 | 7F  | <i>fus</i> |
| GA47502 | AGNV00000000 | 19A | <i>sfu</i> |
| GA47688 | AGPW00000000 | 19A | <i>fus</i> |

|                      |              |     |            |
|----------------------|--------------|-----|------------|
| GA47751              | AGQD00000000 | 19A | <i>fus</i> |
| GA47778              | AGPX00000000 | 19A | <i>fus</i> |
| GA47901              | AFGR00000000 | 1   | <i>sfu</i> |
| GA47976              | AGPY00000000 | 19F | <i>fus</i> |
| GA49138              | AGOD00000000 | 19F | <i>fus</i> |
| GA49447              | AGOK00000000 | 19A | <i>fus</i> |
| GA54644              | AGQA00000000 | 19A | <i>fus</i> |
| HUNGARY 19A-6        | CP000936.1   | 19A | <i>sfu</i> |
| INV104               | FQ312030.1   | 1   | <i>sfu</i> |
| INV200               | FQ312029.1   | 14  | <i>fus</i> |
| JJA                  | CP000919.1   |     | <i>fus</i> |
| MLV-016              | ABGH00000000 | 11A | <i>fus</i> |
| Netherlands 15B-37   | AGQB00000000 | 15B | <i>fus</i> |
| NORTH CAROLINA 6A-23 | AGQL00000000 | 6A  | <i>fus</i> |
| NP070                | AGOH00000000 | 23F | <i>sfu</i> |
| NP112                | AGQF00000000 | 6B  | <i>fus</i> |
| NP127                | AGQC00000000 | 6A  | <i>fus</i> |
| NP170                | AGOS00000000 | 23F | <i>fus</i> |
| OXC141               | FQ312027.1   | 3   | <i>fus</i> |
| P1031                | CP000920.1   | 1   | <i>sfu</i> |
| PSEUDOPN IS7493      | NC_015875    |     | <i>fus</i> |
| R6                   | AE007317.1   | 2   | <i>sfu</i> |
| SP11_BS70            | ABAC00000000 | 11  | <i>fus</i> |
| SP14_BS292           | ABWQ00000000 | 14  | <i>fus</i> |
| SP14_BS69            | ABAD00000000 | 14  | <i>fus</i> |
| SP18_BS74            | ABAE00000000 | 18C | <i>fus</i> |
| SP19_BS75            | ABAF00000000 | 19F | <i>fus</i> |
| SP195                | ABGE00000000 | 9V  | <i>fus</i> |
| SP23-BS72            | ABAG00000000 | 23F | <i>sfu</i> |
| SP3_BS71             | AAZZ00000000 | 3   | <i>fus</i> |
| SP6_BS73             | ABAA00000000 | 6A  | <i>fus</i> |
| SP9_BS68             | ABAB00000000 | 9F  | <i>fus</i> |
| SP-BS293             | ABWU00000000 | 9V  | <i>fus</i> |
| SPN032672            | FQ312039.1   | 1   | <i>sfu</i> |
| SPN033038            | FQ312042.1   | 1   | <i>sfu</i> |
| SPN034156            | FQ312045.1   | 3   | <i>fus</i> |
| SPN034183            | FQ312043.1   | 3   | <i>fus</i> |
| SPN994038            | FQ312041.1   | 3   | <i>fus</i> |
| SPN994039            | FQ312044.1   | 3   | <i>fus</i> |
| TCH8431/19A          | CP001993.1   | 19A | <i>fus</i> |
| Tiawan19F-14         | CP000921.1   | 19F | <i>fus</i> |
| TIGR4                | AAGY00000000 | 4   | <i>fus</i> |

---
